# Supplementary material for: Why Has Personality Psychology Played an Outsized Role in the Credibility Revolution?
Source: PubMed Central journal article supplement (PMC9008744; doi:10.5964/ps.6001), 2021-08-12
Supplement: NIHMS1787713-supplement-1.pdf [file NIHMS1787713-supplement-1.pdf]

## Supplementary Materials

For this article the following Supplementary Materials are available via the PsychArchives repository (for access see [Index of Supplementary Materials](#) below):

- Open Peer-Review.
- Analysis of 50 most-cited empirical papers using personality as keyword.

### Index of Supplementary Materials

Personality Science. (Ed.). (2021). *Supplementary materials to: Why has personality psychology played an outsized role in the credibility revolution?* [Open peer-review]. PsychOpen GOLD. <https://doi.org/10.23668/psycharchives.5037>

Atherton, O. E., Chung, J. M., Harris, K., Rohrer, J. M., Condon, D. M., Cheung, F., Vazire, S., Lucas, R. E., Donnellan, M. B., Mroczek, D. K., Soto, C. J., Antonoplis, S., Damian, R. I., Funder, D. C., Srivastava, S., Fraley, R. C., Jach, H., Roberts, B. W., Smillie, L. D., . . . Corker, K. S. (2021). *Supplementary materials to: Why has personality psychology played an outsized role in the*

*credibility revolution?* [Additional information]. PsychOpen GOLD.

<https://doi.org/10.23668/psycharchives.5038>
